# Supplementary material
Source: PubMed Central journal article supplement (PMC2830067)
Supplement: NIHMS133768-supplement-01.pdf [file NIHMS133768-supplement-01.pdf]

## Supplemental Figures

|                              |     |            |            |            |            |  |  |  |
|------------------------------|-----|------------|------------|------------|------------|--|--|--|
|                              |     |            | ▼          |            |            |  |  |  |
| <i>A. aeolicus</i>           | 120 | FAMGSSTEYS | AFFPTKNPWD | LERVPGGSSG | GSAASVAVLS |  |  |  |
| <i>B. subtilis</i>           | 127 | FAMGSSTENS | AYKLTKNPWN | LDTVPGGSSG | GSAAAVAAGE |  |  |  |
| <i>H. pylori</i>             | 101 | FAMGSTTESS | CYGITKNPRD | KNIVPGGSSG | GSAAAVAGGL |  |  |  |
| <i>N. meningitidis</i>       | 124 | FAMGSTNENS | FYGAAKNPWN | LEHVPGGSSG | GSAAVVAARL |  |  |  |
| <i>S. aureus</i>             | 127 | FAMCGSTETS | YFKKTVNPFD | HKAVPGGSSG | GSAAAVAAGL |  |  |  |
| <i>M. thermautotrophicus</i> | 125 | FAAGSSTETS | FFGPTDNPAA | PGRIPGGSSG | GSAAAVAAGM |  |  |  |
|                              |     |            |            |            |            |  |  |  |
|                              |     |            | ▼          |            |            |  |  |  |
| <i>A. aeolicus</i>           | 160 | APVSLGSDTG | GSIRQPASFC | GVIQIKPTYG | RVSRYGLVAF |  |  |  |
| <i>B. subtilis</i>           | 167 | VPFSLGSDTG | GSIRQPASFC | GVVGLKPTYG | RVSRYGLVAF |  |  |  |
| <i>H. pylori</i>             | 141 | TVAALGSDTG | GSIRQPASYC | GCVGLKPTYG | RVSRYGVIAY |  |  |  |
| <i>N. meningitidis</i>       | 164 | APAALGSDTG | GSIRQPASFC | GITIKPTYG  | TVSRFGMVAY |  |  |  |
| <i>S. aureus</i>             | 167 | VPLSLGSDTG | GSIRQPAYYC | GVVGMKPTYG | RVSRYGLVAF |  |  |  |
| <i>M. thermautotrophicus</i> | 165 | CDLALGSDTG | GSIRNPASFC | GVMGFKPTYG | AVSRQGLLDL |  |  |  |

**Supplemental Figure 1. Sequence alignment of the active site of GatA from bacteria (blue) and archaea (green).** GatA sequences selected from GatCAB enzymes with structural or biochemical data for amide donor preference. Residues highlighted in black are highly conserved amongst GatA polypeptides. The ▼ denotes a residue in the *A. aeolicus* GatCAB structure implicated in the enzyme being able to use both Gln and Asn as amide donors. The ▼ denotes the Ser residue in GatA that serves as the nucleophile.

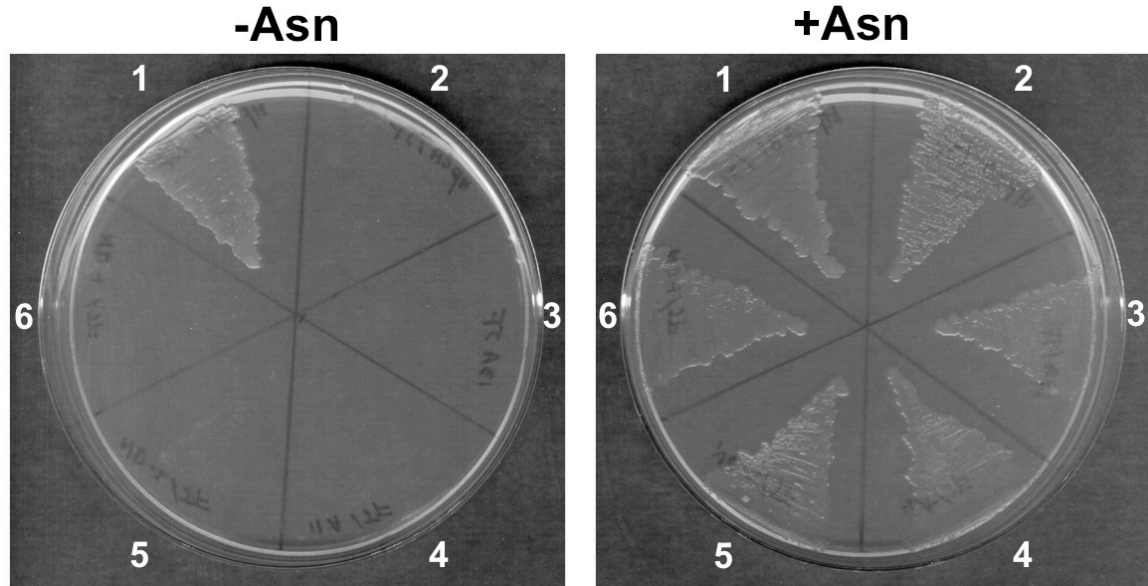

**Supplemental Figure 2. Rescue of the Asn auxotrophy of *E. coli* JF448 strain by co-expression of *Deinococcus radiodurans* ND-AspRS and *Helicobacter pylori* GatCAB requires both Mg<sup>2+</sup> binding sites in B-subunit active pocket.** *E. coli* JF448 cells were transformed with a pCBS2 plasmid encoding *D. radiodurans* ND-AspRS with either 1) wild-type *H. pylori* GatCAB, 2) *H. pylori* GatCA, or 3-6) mutant *H. pylori* GatCAB enzymes [3) Glu11Ala mutation in B-subunit, 4) His13Ala mutation in B-subunit, 5) Deletion of the first 18 residues in the B-subunit, and 6) Deletion of the first 30 residues in the B-subunit]. The resulting strains were grown on M9 minimal media agar plates with (right panel) or without (left panel) Asn. *H. pylori* GatB Glu11 is equivalent to *A. aeolicus* GatB Glu12 which coordinates the Mg<sup>2+</sup> in the transient metal site. *H. pylori* GatB His13 is equivalent to *A. aeolicus* GatB His14 which coordinates the Mg<sup>2+</sup> in the permanent metal site.

|                              |     |             |    |     |             |    |
|------------------------------|-----|-------------|----|-----|-------------|----|
|                              |     |             | ▼▼ |     |             | ▼▼ |
| <i>A. aeolicus</i>           | 20  | KTKMFCGCKV  |    | 38  | NVCPVCLGMP  |    |
| <i>A. thalina</i>            | 150 | LTKAFSCSN   |    | 168 | SICPVMGLP   |    |
| <i>D. desulfuricans</i>      | 22  | KTKLFCNCST  |    | 40  | HVCPVCLGLP  |    |
| <i>G. violaceus</i>          | 26  | ETKLFRCST   |    | 43  | NICPICTGQP  |    |
| <i>H. pylori</i>             | 18  | KTKLFCSCST  |    | 36  | NTCPVCLGLP  |    |
| <i>S. avermitilis</i>        | 33  | KT MFCGCST  |    | 51  | QTCPVCLGMP  |    |
| <i>T. thermophilus</i>       | 17  | RTKMFCGCRA  |    | 36  | HTCPVCLGLP  |    |
| <i>T. pallidum</i>           | 41  | KTKAFACAN   |    | 59  | RVCPVCLGLP  |    |
| <i>A. variabilis</i>         | 26  | NTKLFSSSST  |    | 44  | NIDPVMGLP   |    |
| <i>B. subtilis</i>           | 18  | NSKLFASPT   |    | 36  | QTSVIDLQYP  |    |
| <i>C. crescentus</i>         | 30  | KSKLFSGAAV  |    | 48  | QVSLVDAAMP  |    |
| <i>C. trachomatis</i>        | 23  | ASKLFSARN   |    | 41  | NISPVCTGMP  |    |
| <i>D. geothermalis</i>       | 116 | RSKLFSA CPA |    | 135 | YTDPLTLGLP  |    |
| <i>N. meningitidis</i>       | 18  | KSKLFSGAST  |    | 36  | HASVVECALP  |    |
| <i>N. sennetsu</i>           | 26  | KNKLFSDAPC  |    | 44  | AVTLFDAAMP  |    |
| <i>P. aeruginosa PAO1</i>    | 18  | QSKLFSGSST  |    | 36  | QASLVDTLAMP |    |
| <i>S. aureus</i>             | 18  | DSKMFSPSPA  |    | 36  | NTNVIDLAYP  |    |
| <i>A. pernix</i>             | 22  | GSKLFCGDS   |    | 41  | NVCPVCLGLP  |    |
| <i>H. marismortui</i>        | 26  | ETKLFRCST   |    | 45  | HTCPVCLGLP  |    |
| <i>M. hungatei</i>           | 19  | KSKMFCSCST  |    | 38  | HTCPVCLGLP  |    |
| <i>M. kandleri</i>           | 17  | RTKLFDCPT   |    | 36  | NTCPVCTGMP  |    |
| <i>M. maripaludis</i>        | 20  | NSKLFQCPT   |    | 39  | NICPVCTGHP  |    |
| <i>M. mazei</i>              | 23  | KTKMFCGCST  |    | 42  | HTCPVCLGLP  |    |
| <i>M. thermautotrophicus</i> | 14  | RSKLFRCPT   |    | 33  | NICPVCLNQP  |    |
| <i>N. equitans</i>           | 14  | ETKLFPCPKI  |    | 32  | NVCEICLQYP  |    |
| <i>S. solfataricus</i>       | 2   | KTKLFCSCPS  |    | 21  | VTCPVCLGLP  |    |
| <i>A. pernix</i>             | 24  | REKLFSC CPA |    | 79  | HSCLVEADEE  |    |
| <i>F. acidarmanus</i>        | 17  | N-KLFCSCST  |    | 69  | NSCLVEKDEE  |    |
| <i>H. marismortui</i>        | 24  | ATKLFDCPT   |    | 80  | TTCLVEEDEE  |    |
| <i>M. hungatei</i>           | 23  | KEKLFRCPT   |    | 79  | TTCLVENDEE  |    |
| <i>M. kandleri</i>           | 26  | SRKLFRCPT   |    | 83  | FSCLVELDEE  |    |
| <i>M. maripaludis</i>        | 23  | KRKLFNCPT   |    | 79  | TTCLVELDEE  |    |
| <i>M. mazei</i>              | 24  | KEKLFRCPT   |    | 80  | TTCLVENDEE  |    |
| <i>M. thermautotrophicus</i> | 21  | ESKLFPCRT   |    | 77  | ETCLVEADEE  |    |
| <i>N. equitans</i>           | 14  | K-KLFCES    |    | 67  | NSCLVELDEE  |    |
| <i>P. aerophilum</i>         | 21  | QRKLFCHCPP  |    | 77  | TTCLVELDEE  |    |
| <i>S. solfataricus</i>       | 24  | PHKLFNCST   |    | 79  | TSCLVEADEE  |    |
| <i>P. abyssi</i>             | 28  | K-KLFSVPS   |    | 82  | LTDLVYMDEE  |    |

**Supplemental Figure 3. Sequence alignment of the Zn<sup>2+</sup> motif of GatB from representative bacteria (blue) and archaea (green), and representative GatE sequences (maroon).** Residues highlighted in black are highly conserved in the GatB/E family. Residues highlighted in grey are highly conserved in GatE sequences. The ▼ denotes the residues that coordinate the Zn<sup>2+</sup> in the *A. aeolicus* GatCAB structure.
